# Supplementary material for: Neurons Induced From Fibroblasts of c9ALS/FTD Patients Reproduce the Pathology Seen in the Central Nervous System
Source: PubMed Central journal article supplement (PMC6743368; doi:10.3389/fnins.2019.00935), 2019-09-06
Supplement: Data_Sheet_1.pdf [file Data_Sheet_1.pdf]

## Supplementary Information

# Neurons induced from fibroblasts of c9ALS/FTD patients reproduce the pathology seen in the central nervous system

Peter O. Bauer, Judith H. Dunmore, Hiroki Sasaguri, Vaclav Matoska

## Supplementary Material and Methods

### Immunocytochemistry

Cells were processed as described in Material and Methods. Rabbit anti-TDP-43 (Proteintech; 1:1000) and mouse anti-ALYREF (Thermo Fisher; 1:1000) antibodies were diluted in 5% skim milk/TBS-T.

### Cell toxicity assay

The iNeurons were grown in 96-well plates and treated with 5  $\mu$ M of tunicamycin. After 24 hrs, 5  $\mu$ g/ml each of Hoechst 33258 (Invitrogen) and propidium iodide (PI) were added to the cells followed by 10 min incubation at 37°C. The PI-positive cells were quantified using BD Pathway Bio-imager (BD Biosciences) as a percentage of Hoechst 33258-positive cells. Same procedure was performed with iNeurons treated with 10  $\mu$ M glutamate (Sigma) for 8 hrs. LDH levels in the medium were measured as described in Material and Methods.

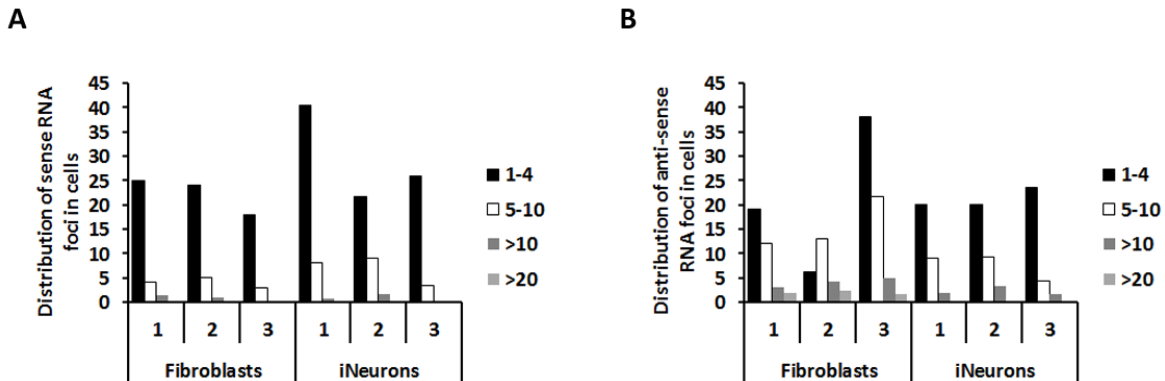

### Supplementary Figure 1. Number of RNA foci per cell in fibroblasts and iNeurons.

Distribution of (A) sense and (B) anti-sense RNA foci in the dermal fibroblasts and the corresponding iNeurons. Y-axes represent percentage of cells containing foci. Note the higher numbers of anti-sense foci per cell when compared to the sense RNA foci.

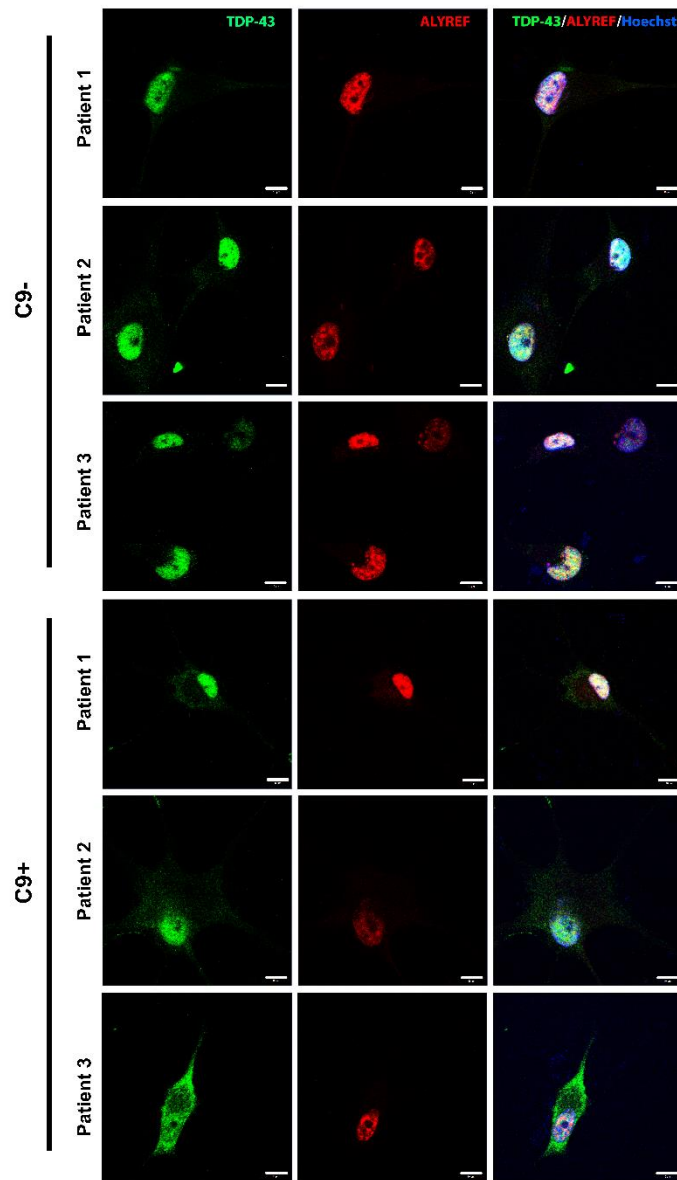

**Supplementary Figure 2. TDP-43 localization in iNeurons.** Cells were co-stained for ALYREF, a nuclear protein that has been shown to be sequestered by RNA foci in c9ALS/FTD neurons (Cooper-Knock et al., 2014). A partial translocation of TDP-43 to the cytoplasm was observed primarily in C9+ iNeurons. Blue staining: Hoechst 33258. Scale bars, 10  $\mu$ m.

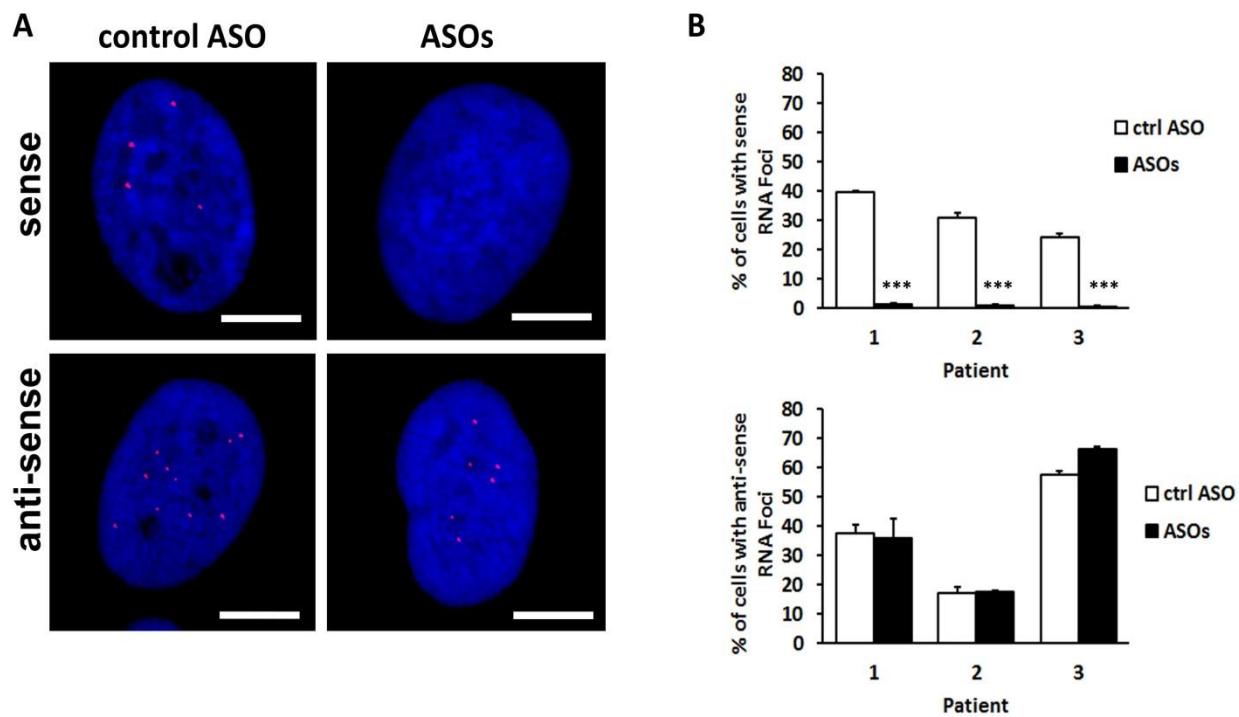

**Supplementary Figure 3. Effect of ASOs on RNA foci in the fibroblasts.** (A) ASOs reduce the number of C9+ fibroblasts with (S) but not (AS) RNA foci. Blue staining: Hoechst 33258. Scale bars, 20  $\mu$ m. (B) Quantification of C9+ fibroblasts containing RNA foci. \*\*\* $p$ <0.001.

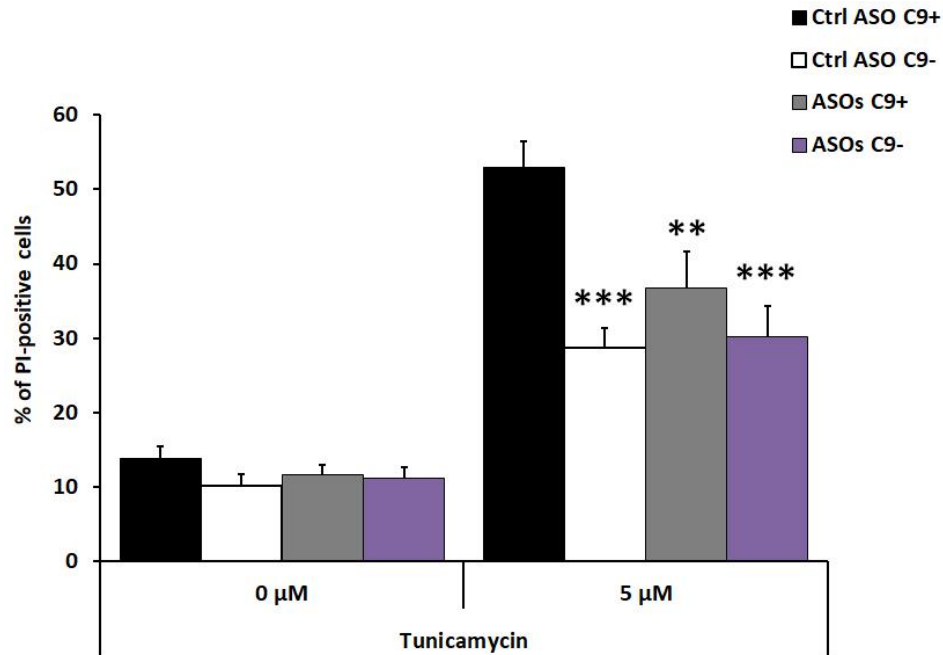

**Supplementary Figure 4. Effect of anti-sense oligonucleotides targeting the sense strand of the *c9orf72* repeat, r(GGGGCC)<sub>exp</sub>, on cell viability (analyzed by PI staining) of iNeurons treated with 0 or 5 μM tunicamycin.** ASOs reduce the tunicamycin toxicity in C9+ iNeurons. Data represents mean ± standard error of the mean (SEM; n=6, each with data from two wells, three C9+ and three C9- cell lines were used). (\*\*p<0.005, \*\*\*p<0.001).

**A**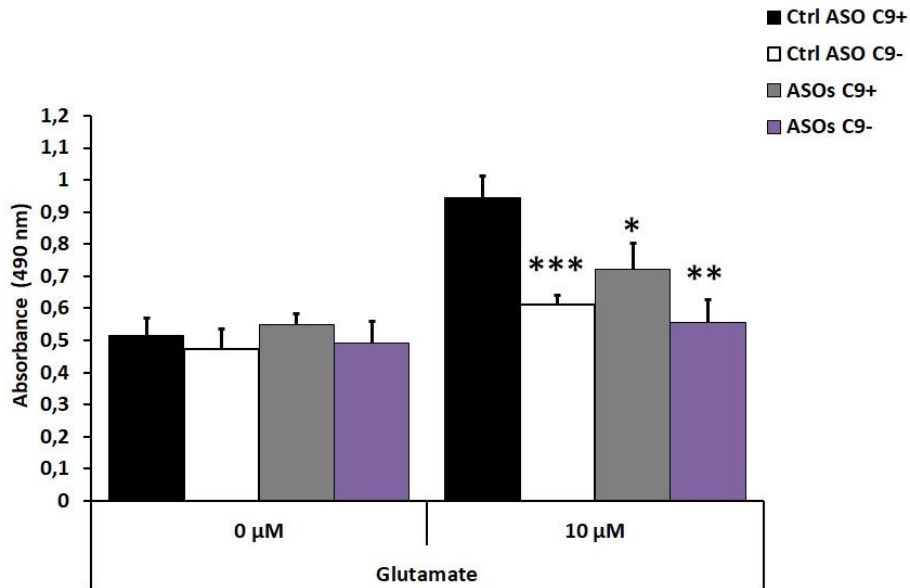**B**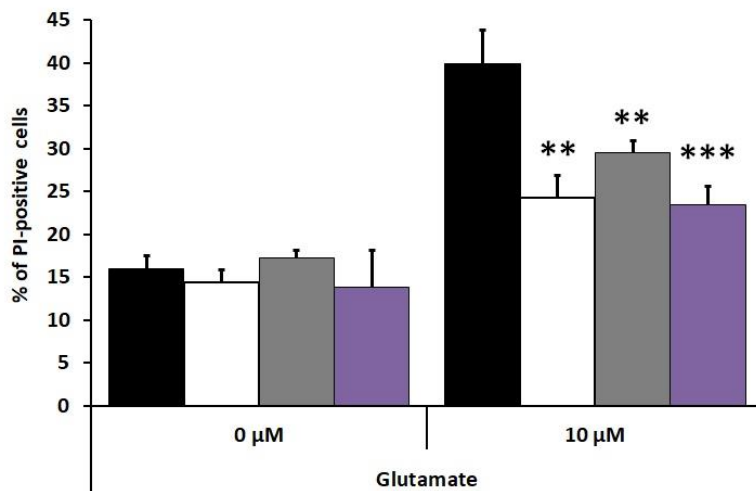

**Supplementary Figure 5. Effect of anti-sense oligonucleotides targeting the sense strand of the *c9orf72* repeat, r(GGGGCC)<sub>exp</sub>, on cell viability of iNeurons treated with 0 or 10 μM glutamate. ASOs reduce the glutamate toxicity in C9+ iNeurons. (A) LDH assay. (B) PI staining. Data represents mean ± standard error of the mean (SEM; n=6, each with data from two wells, three C9+ and three C9- cell lines were used). (\*p<0.05, \*\*p<0.005, \*\*\*p<0.001).**

## Supplementary references

Cooper-Knock, J., Walsh, M. J., Higginbottom, A., Robin Highley, J., Dickman, M. J., Edbauer, D., et al. (2014). Sequestration of multiple RNA recognition motif-containing proteins by C9orf72 repeat expansions. *Brain* 137, 2040-2051. doi: 10.1093/brain/awu120
